# Supplementary material for: Polymorphism and isostructurality in sulfonylhydrazones
Source: Royal Society of Chemistry journal article supplement (doi:10.1039/c3ce42301h), 2014-01-01
Supplement: c3ce42301h.pdf [file c3ce42301h.pdf]

## Electronic Supporting Information†

### Polymorphism and Isostructurality in Sulfonylhydrazones

Ranjit Thakuria, Naba K. Nath, Saikat Roy, and Ashwini Nangia\*

School of Chemistry, University of Hyderabad, Central University PO, Prof. C. R. Rao Road, Gachibowli, Hyderabad, 500 046, India

E-mail: [ashwini.nangia@gmail.com](mailto:ashwini.nangia@gmail.com), [ranjit.thakuria@gmail.com](mailto:ranjit.thakuria@gmail.com)

#### Experimental Section

Sulfonylhydrazones were synthesized using the following procedure (Scheme S1) and purified by recrystallization from ethanol. Melting points were determined in Fischer-Jones apparatus.

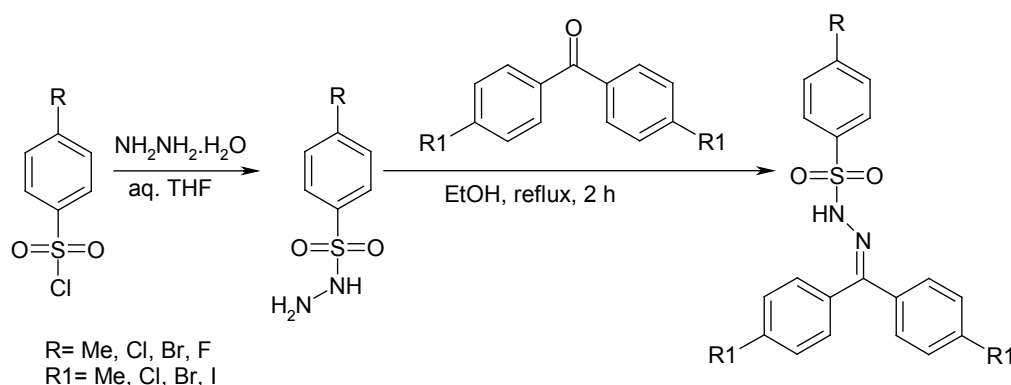

**Scheme S1** Reaction procedure used to synthesize Sulfonylhydrazones.

**CMSH:** To a stirred solution of *p*-chlorosulfonyl chloride (5.0 g, 23 mmol) in 25 mL THF was added hydrazine hydrate (2.5 g, 49 mmol) drop wise at 0°C. The reaction was continued for 30 min and the product extracted with ether to give *p*-chlorosulfonyl hydrazine. To a well stirred solution of *p*-chlorosulfonyl hydrazine (500 mg, 2.42 mmol) in 10 mL ethanol was added equimolar amount of 4,4'-dimethyl benzophenone (508.87 mg, 2.42 mmol) and was refluxed for 2 h. Cooling the reaction mixture afforded crystalline bis(*p*-tolyl)ketone *p*-chlorosulfonyl hydrazone as precipitate which was then filtered, washed with cold ethanol and recrystallized from hot ethanol.

<sup>1</sup>H NMR (500 MHz, DMSO-D<sub>6</sub>, δ ppm): 2.28 (3H, s), 2.39 (3H, s), 7.10 (4H, d, J 10), 7.32 (2H, d, J 10), 7.71 (4H, d, J 10), 7.91 (2H, d, J 10), 10.46 (1H, s).

FT-IR (KBr, cm<sup>-1</sup>): 3188, 1585, 1346, 1167.

M. p.: 161-162 °C.

**TCSH, TBSh, FMSH and MISH** were synthesized using the above procedure.

**TCSH:**

<sup>1</sup>H NMR (400 MHz, CDCl<sub>3</sub>, δ ppm): 7.39 (4H, d, J 8), 7.52 (2H, d, J 8), 7.71 (4H, d, J 8), 7.90 (2H, d, J 8).

FT-IR (KBr, cm<sup>-1</sup>): 3194, 1587, 1352, 1168.

M. p.: 203-205 °C.

### TBSH:

$^1\text{H NMR}$  (500 MHz, DMSO- $\text{D}_6$ ,  $\delta$  ppm): 7.2 (4H, d, J 10), 7.55 (2H, d, J 10), 7.73 (4H, d, J 10), 7.8 (2H, d, J 10), 10.8 (1H, s).

FT-IR (KBr,  $\text{cm}^{-1}$ ): 3192, 1589, 1346, 1170.

M. p.: 236-239 °C.

### FMSH:

$^1\text{H NMR}$  (400 MHz,  $\text{CDCl}_3$ ,  $\delta$  ppm): 2.30 (6H, s), 6.98 (4H, d, J 8), 7.21 (2H, d, J 8), 7.41 (4H, d, J 8), 7.63 (2H, d, J 8). The NH proton could not be located in the usual 0-10 ppm range.

FT-IR (KBr,  $\text{cm}^{-1}$ ): 3184, 1585, 1317, 1176.

M. p.: 139-143 °C.

### MISH:

$^1\text{H NMR}$  (500 MHz, DMSO- $\text{D}_6$ ,  $\delta$  ppm): 2.39 (3H, s), 7.41 (4H, d, J 10), 7.71 (2H, d, J 10), 7.77 (4H, d, J 10), 7.88 (2H, d, J 10), 10.66 (1H, s).

FT-IR (KBr,  $\text{cm}^{-1}$ ): 3186, 1595, 1346, 1167.

M. p.: 249-253 °C.

### X-ray Crystallography

X-ray reflections were collected on a Bruker SMART APEXCCD equipped with a graphite monochromator and Mo- $\text{K}_\alpha$  fine-focus sealed tube ( $\lambda = 0.71073 \text{ \AA}$ ). Data reduction was performed using Bruker SAINT software.<sup>1</sup> Intensities for absorption were corrected using SADABS.<sup>2</sup> Structure solution and refinement were carried out using Bruker SHELXTL.<sup>3</sup> The hydrogen atoms were refined isotropically and the heavy atoms were refined anisotropically. N-H hydrogens were located from difference electron density maps and C-H hydrogens were fixed using HFIX command in SHELXTL. A check of the final CIF file using PLATON<sup>4</sup> did not show any missed symmetry. CIF files of all the crystal structures contain refinement details under `_refine_special_details`. Packing diagrams were prepared using X-Seed.<sup>5</sup>

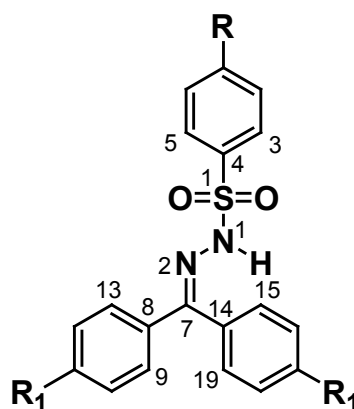

**Scheme S2** The labeled atoms of sulfonylhydrazone for dihedral angles measurements.

**CMSH:** R =  $\text{CH}_3$ ,  $\text{R}_1 = \text{Cl}$ ; **TCSH:** R =  $\text{R}_1 = \text{Cl}$ ; **TBSH:** R =  $\text{R}_1 = \text{Br}$ ; **FMSH:** R = F,  $\text{R}_1 =$

CH<sub>3</sub>; **MISH**: R = CH<sub>3</sub>, R<sub>1</sub> = I. The labeling of atoms is different depending on the symmetry in the crystal structure.

**Table S1** Dihedral angle of sulfonylhydrazones.

| Compound | Atom <sup>a</sup> | Dihedral Angle |
|----------|-------------------|----------------|
| CMSH-I   | C5–C4–S1–N1       | 64.41(1)       |
|          | C3–C4–S1–N1       | 116.96(1)      |
|          | N2–C7–C14–C15     | 1.68 (1)       |
|          | N2–C7–C14–C19     | 179.73 (1)     |
|          | N2–C7–C8–C9       | 78.12 (1)      |
|          | N2–C7–C8–C13      | 99.07(1)       |
| CMSH-II  | C3–C4–S1–N1       | 61.38 (3)      |
|          | C5–C4–S1–N1       | 120.08 (3)     |
|          | N2–C7–C8–C13      | 5.05 (4)       |
|          | N2–C7–C8–C9       | 173.29 (3)     |
|          | N2–C7–C14–C19     | 75.12 (4)      |
|          | N2–C7–C14–C15     | 100.59 (4)     |
| TCSH     | C5–C4–S1–N1       | 64.42 (1)      |
|          | C3–C4–S1–N1       | 116.28 (1)     |
|          | N2–C7–C14–C15     | 0.05 (2)       |
|          | N2–C7–C14–C19     | 179.64 (1)     |
|          | N2–C7–C8–C9       | 77.03 (2)      |
|          | N2–C7–C8–C13      | 100.26 (1)     |
| TBSH     | C3–C4–S1–N1       | 63.46 (2)      |
|          | C5–C4–S1–N1       | 116.97 (2)     |
|          | N2–C7–C8–C13      | 2.22 (3)       |
|          | N2–C7–C8–C9       | 176.91 (2)     |
|          | N2–C7–C14–C19     | 75.35 (3)      |
|          | N2–C7–C14–C15     | 100.91 (3)     |

|      |               |            |
|------|---------------|------------|
| FMSH | C3–C4–S1–N1   | 61.19 (1)  |
|      | C5–C4–S1–N1   | 120.76 (1) |
|      | N2–C7–C14–C15 | 4.15 (2)   |
|      | N2–C7–C14–C19 | 177.36 (1) |
|      | N2–C7–C8–C13  | 74.20 (2)  |
|      | N2–C7–C8–C9   | 102.86 (2) |
| MISH | C5–C4–S1–N1   | 54.90 (1)  |
|      | C3–C4–S1–N1   | 124.84 (1) |
|      | N2–C7–C14–C15 | 6.73 (1)   |
|      | N2–C7–C14–C19 | 171.49 (1) |
|      | N2–C7–C8–C9   | 72.49 (1)  |
|      | N2–C7–C8–C13  | 106.17 (1) |

---

<sup>a</sup> Labeling of atoms is different depending on the symmetry in the crystal structure.

**Table S2** Comparison between crystallographic parameters of CMSH-I and CMSH-II with reported isomorphous aryl sulfonylhydrazone derivatives.

|                                       | <b>CMSH-I</b><br>(in this study)                                  | <b>TMSH form 1</b><br>(reported) <sup>16b</sup>                 | <b>MCSH</b><br>(reported) <sup>16b</sup>                                        | <b>CMSH-II</b><br>(in this study)                                 | <b>MBSH</b><br>(reported) <sup>16b</sup>                                        |
|---------------------------------------|-------------------------------------------------------------------|-----------------------------------------------------------------|---------------------------------------------------------------------------------|-------------------------------------------------------------------|---------------------------------------------------------------------------------|
| Chemical formula                      | C <sub>21</sub> H <sub>19</sub> ClN <sub>2</sub> O <sub>2</sub> S | C <sub>22</sub> H <sub>22</sub> N <sub>2</sub> O <sub>2</sub> S | C <sub>20</sub> H <sub>16</sub> Cl <sub>2</sub> N <sub>2</sub> O <sub>2</sub> S | C <sub>21</sub> H <sub>19</sub> ClN <sub>2</sub> O <sub>2</sub> S | C <sub>20</sub> H <sub>16</sub> Br <sub>2</sub> N <sub>2</sub> O <sub>2</sub> S |
| Formula weight                        | 398.89                                                            | 378.48                                                          | 419.31                                                                          | 398.89                                                            | 508.23                                                                          |
| Crystal system                        | Monoclinic                                                        | Monoclinic                                                      | Monoclinic                                                                      | Orthorhombic                                                      | Orthorhombic                                                                    |
| Space group                           | <i>C2/c</i>                                                       | <i>C2/c</i>                                                     | <i>C2/c</i>                                                                     | <i>Pbca</i>                                                       | <i>Pbca</i>                                                                     |
| T/K                                   | 298(2)                                                            | 298(2)                                                          | 100(2)                                                                          | 298(2)                                                            | 100(2)                                                                          |
| a/Å                                   | 22.305(2)                                                         | 22.250(3)                                                       | 22.4996(17)                                                                     | 11.726(5)                                                         | 11.4666(7)                                                                      |
| b/Å                                   | 12.0112(12)                                                       | 12.1201(15)                                                     | 11.4602(7)                                                                      | 15.488(7)                                                         | 15.5694(9)                                                                      |
| c/Å                                   | 15.3336(15)                                                       | 15.2891(19)                                                     | 15.4310(9)                                                                      | 22.317(10)                                                        | 22.2113(13)                                                                     |
| α/°                                   | 90                                                                | 90                                                              | 90                                                                              | 90                                                                | 90                                                                              |
| β/°                                   | 100.953(2)                                                        | 100.538(2)                                                      | 102.552(2)                                                                      | 90                                                                | 90                                                                              |
| γ/°                                   | 90                                                                | 90                                                              | 90                                                                              | 90                                                                | 90                                                                              |
| Z                                     | 8                                                                 | 8                                                               | 8                                                                               | 8                                                                 | 8                                                                               |
| V/Å <sup>3</sup>                      | 4033.1(7)                                                         | 4053.5(9)                                                       | 3883.8(4)                                                                       | 4053(3)                                                           | 3965.3(4)                                                                       |
| D <sub>calc</sub> /g cm <sup>-3</sup> | 1.314                                                             | 1.240                                                           | 1.434                                                                           | 1.307                                                             | 1.703                                                                           |
| μ/mm <sup>-1</sup>                    | 0.311                                                             | 0.178                                                           | 0.460                                                                           | 0.309                                                             | 4.212                                                                           |
| R1[I > 2(I)]                          | 0.0514                                                            | 0.0501                                                          | 0.0317                                                                          | 0.0451                                                            | 0.0241                                                                          |
| wR2 (all)                             | 0.1270                                                            | 0.1307                                                          | 0.0833                                                                          | 0.1141                                                            | 0.0589                                                                          |
| Goodness-of-fit                       | 1.039                                                             | 1.037                                                           | 1.057                                                                           | 1.050                                                             | 1.031                                                                           |

Ref. 16(b) S. Roy and A. Nangia, *Cryst. Growth Des.*, 2007, 7, 2047.

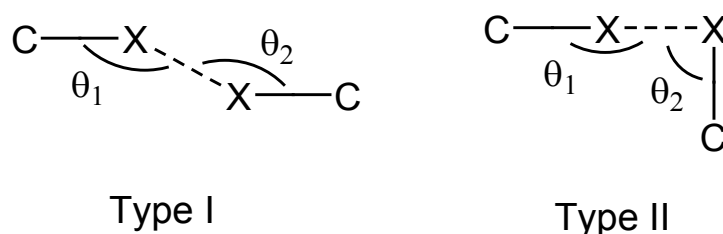

**Figure S1** Halogen (X denotes halogen atom) type I (where  $\theta_1 = \theta_2$ ) and type II ( $\theta_1 \cong 180^\circ$  and  $\theta_2 \cong 90^\circ$ ) inter-halogen interactions.

### TMSH-I

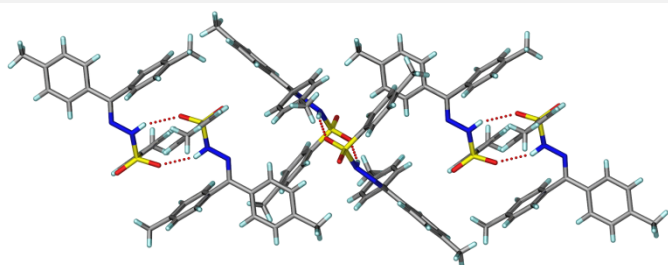

Sulfonamide dimers form 1D tape

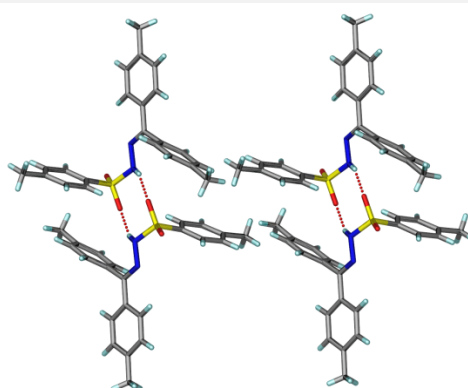

Inversion related sulfonamide dimers

### MCSH

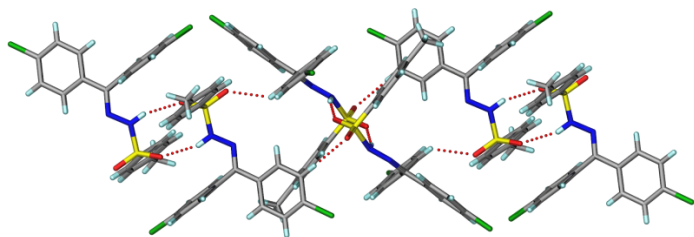

Sulfonamide dimers form 1D tape

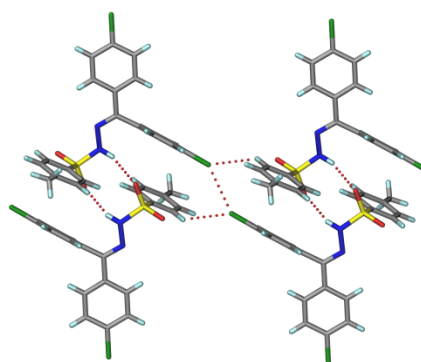

Inversion related sulfonamide dimers

### MBSH

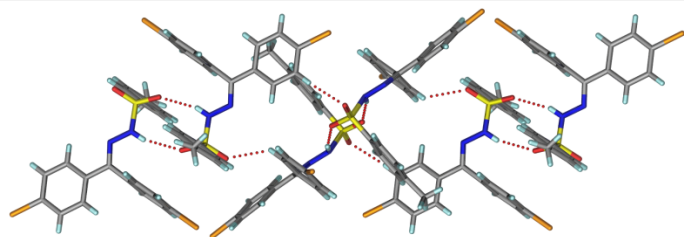

Sulfonamide dimers form 1D tape

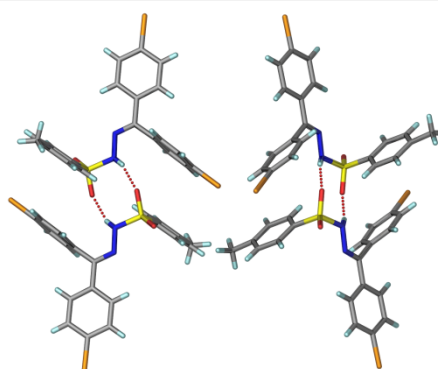

Glide related Sulfonamide dimers

**Figure S2** Sulfonamide dimers and molecular packing in the crystal structures of TMSH-I and MCSH (isomorphous to CMSH-I); and MBSH (isomorphous to CMSH-II).

### References

1. *SAINT-Plus*, version 6.45, Bruker AXS Inc., Madison, WI, 2003.
2. Sheldrick, G. M. *SADABS, Program for Empirical Absorption Correction of Area Detector Data*, University of Göttingen, Germany, 1997.
3. *SHELXS-97 and SHELXL-97, Programs for the Solution and Refinement of Crystal Structures*, Sheldrick, G. M. University of Göttingen, Germany, 1997.
4. A. L. Spek, *PLATON, A Multipurpose Crystallographic Tool*, Utrecht University, Utrecht, The Netherlands, 2001.
5. L. J. Barbour, *X-Seed: Graphical Interface to SHELX-97 and POVray*, University of Missouri-Columbia, Columbia, MO, 1999.
